# Supplementary material for: Reactivity of iron-based nanoparticles by green synthesis under various atmospheres and their removal mechanism of methylene blue
Source: Royal Society of Chemistry journal article supplement (doi:10.1039/c5ra10629j), 2015-01-01
Supplement: c5ra10629j1.pdf [file c5ra10629j1.pdf]

Fig. S1

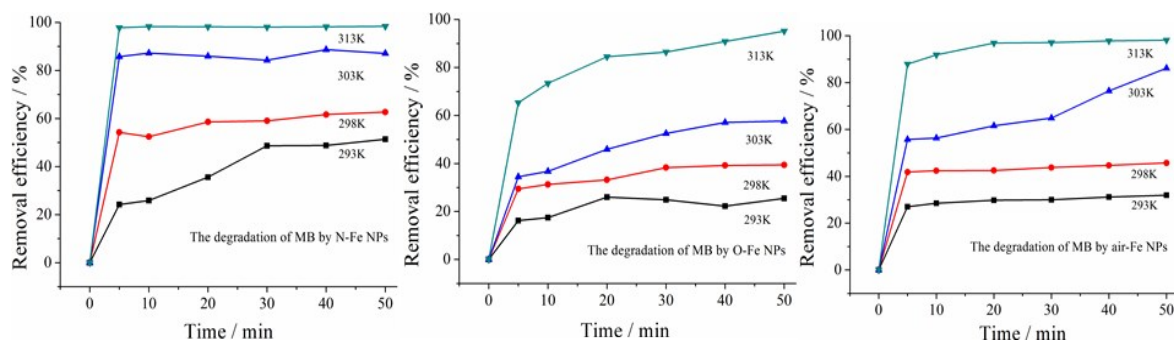

**Fig. S3** The removal efficiency of MB using N-Fe NPs, O-Fe NPs and air-Fe NPs, respectively.

Fig. S2

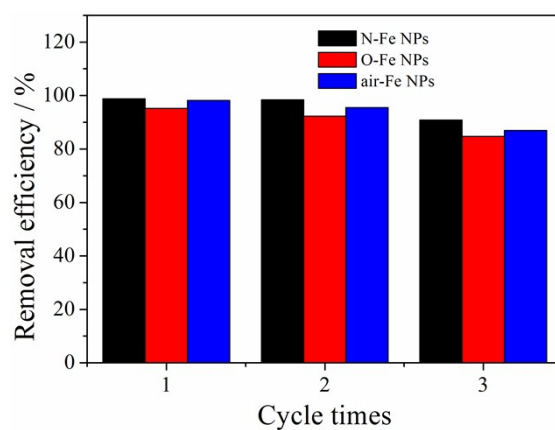

**Fig. S2** The recyclability of N-Fe NPs, O-Fe NPs and air-Fe NPs.

Fig. S3

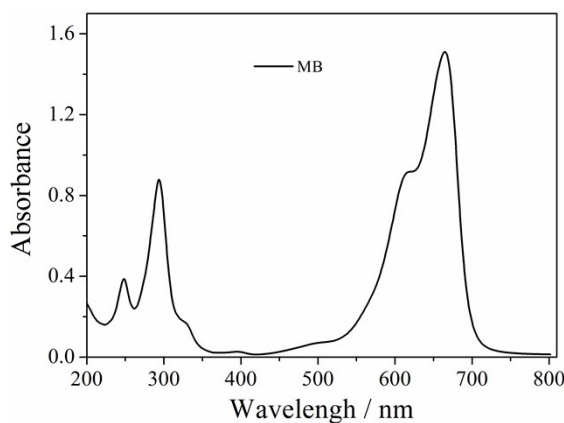

**Fig. S3** The UV-vis of methylene blue
